# Supplementary material
Source: ML conference proceedings conference paper supplement (https://proceedings.mlr.press/v119/ghari20a.html)
Supplement: Supplementary file [file ghari20a-supp.pdf]

## A. Proof of Lemma 1

In order to prove Lemma 1, we first establish the following lemma as a step stone.

**Lemma 3.** Under (a1), (a2), (20a) and (20b) with  $\mathcal{F}_n = \{\hat{f}_n | \hat{f}_n(\mathbf{x}) = \boldsymbol{\theta}^\top \mathbf{z}_n(\mathbf{x}), \forall \boldsymbol{\theta} \in \mathbb{R}^{2D}\}$ , let  $\hat{f}_{RF,n}(\cdot)$  denote the sequence of estimates generated by our MKL algorithm with a preselected kernel  $\kappa_n$ . The following bound holds true with probability 1:

$$\sum_{t=1}^T \mathcal{L}(\hat{f}_{RF,n}(\mathbf{x}_t), y_t) - \sum_{t=1}^T \mathcal{L}(\hat{f}_{t,n}^*(\mathbf{x}_t), y_t) \leq \frac{\|\boldsymbol{\theta}_n^*\|^2}{2\eta q_n^{\min}} + \frac{\eta L^2 T}{2} \quad (25)$$

where  $\eta$  is the learning rate,  $L$  is the Lipschitz constant in (a2),  $q_n^{\min} = \min_{t \in \{1, \dots, T\}} q_{n,t}$ , and  $\boldsymbol{\theta}_n^*$  is the corresponding parameter vector supporting the best estimator  $\hat{f}_{t,n}^*(\mathbf{x}) = (\boldsymbol{\theta}_n^*)^\top \mathbf{z}_n(\mathbf{x})$ .

*Proof.* Note that OMKL-GF updates the  $\boldsymbol{\theta}_{n,t}$  only if the  $n$ -th kernel is in the chosen subset. Therefore, based on (12), for any fixed  $\boldsymbol{\theta}$ , we find

$$\begin{aligned} \|\boldsymbol{\theta}_{n,t+1} - \boldsymbol{\theta}\|^2 &= \|\boldsymbol{\theta}_{n,t} - \eta \nabla \mathcal{L}(\boldsymbol{\theta}_{n,t}^\top \mathbf{z}_n(\mathbf{x}_t), y_t) \mathcal{I}(n \in \mathcal{S}_t) - \boldsymbol{\theta}\|^2 \\ &= \|\boldsymbol{\theta}_{n,t} - \boldsymbol{\theta}\|^2 - 2\eta \nabla^\top \mathcal{L}(\boldsymbol{\theta}_{n,t}^\top \mathbf{z}_n(\mathbf{x}_t), y_t) \mathcal{I}(n \in \mathcal{S}_t) (\boldsymbol{\theta}_{n,t} - \boldsymbol{\theta}) \\ &\quad + \|\eta \nabla \mathcal{L}(\boldsymbol{\theta}_{n,t}^\top \mathbf{z}_n(\mathbf{x}_t), y_t) \mathcal{I}(n \in \mathcal{S}_t)\|^2. \end{aligned} \quad (26)$$

Furthermore, based on the convexity of loss function under (a1), it can be written that

$$\mathcal{L}(\boldsymbol{\theta}_{n,t}^\top \mathbf{z}_n(\mathbf{x}_t), y_t) - \mathcal{L}(\boldsymbol{\theta}^\top \mathbf{z}_n(\mathbf{x}_t), y_t) \leq \nabla^\top \mathcal{L}(\boldsymbol{\theta}_{n,t}^\top \mathbf{z}_n(\mathbf{x}_t), y_t) (\boldsymbol{\theta}_{n,t} - \boldsymbol{\theta}) \quad (27)$$

Combining (26) with (27), we arrive at

$$\begin{aligned} &(\mathcal{L}(\boldsymbol{\theta}_{n,t}^\top \mathbf{z}_n(\mathbf{x}_t), y_t) - \mathcal{L}(\boldsymbol{\theta}^\top \mathbf{z}_n(\mathbf{x}_t), y_t)) \mathcal{I}(n \in \mathcal{S}_t) \\ &\leq \frac{\|\boldsymbol{\theta}_{n,t} - \boldsymbol{\theta}\|^2 - \|\boldsymbol{\theta}_{n,t+1} - \boldsymbol{\theta}\|^2}{2\eta} + \frac{\eta}{2} \|\nabla \mathcal{L}(\boldsymbol{\theta}_{n,t}^\top \mathbf{z}_n(\mathbf{x}_t), y_t) \mathcal{I}(n \in \mathcal{S}_t)\|^2. \end{aligned} \quad (28)$$

Taking the expectation of left hand side of (28) with respect to  $\mathcal{I}(n \in \mathcal{S}_t)$ , we obtain

$$\begin{aligned} &\mathbb{E}[(\mathcal{L}(\boldsymbol{\theta}_{n,t}^\top \mathbf{z}_n(\mathbf{x}_t), y_t) - \mathcal{L}(\boldsymbol{\theta}^\top \mathbf{z}_n(\mathbf{x}_t), y_t)) \mathcal{I}(n \in \mathcal{S}_t)] \\ &= (\mathcal{L}(\boldsymbol{\theta}_{n,t}^\top \mathbf{z}_n(\mathbf{x}_t), y_t) - \mathcal{L}(\boldsymbol{\theta}^\top \mathbf{z}_n(\mathbf{x}_t), y_t)) \times 1 \times q_{n,t} + (\mathcal{L}(\boldsymbol{\theta}_{n,t}^\top \mathbf{z}_n(\mathbf{x}_t), y_t) - \mathcal{L}(\boldsymbol{\theta}^\top \mathbf{z}_n(\mathbf{x}_t), y_t)) \times 0 \times (1 - q_{n,t}) \\ &= q_{n,t} (\mathcal{L}(\boldsymbol{\theta}_{n,t}^\top \mathbf{z}_n(\mathbf{x}_t), y_t) - \mathcal{L}(\boldsymbol{\theta}^\top \mathbf{z}_n(\mathbf{x}_t), y_t)) \end{aligned} \quad (29)$$

where  $q_{n,t}$  is the probability that the  $n$ -th kernel is in the chosen subset of kernels. Moreover, for the expectation of right hand side of (28), we have

$$\begin{aligned} &\mathbb{E}\left[\frac{\|\boldsymbol{\theta}_{n,t} - \boldsymbol{\theta}\|^2 - \|\boldsymbol{\theta}_{n,t+1} - \boldsymbol{\theta}\|^2}{2\eta} + \frac{\eta}{2} \|\nabla \mathcal{L}(\boldsymbol{\theta}_{n,t}^\top \mathbf{z}_n(\mathbf{x}_t), y_t) \mathcal{I}(n \in \mathcal{S}_t)\|^2\right] \\ &= \frac{\|\boldsymbol{\theta}_{n,t} - \boldsymbol{\theta}\|^2 - \|\boldsymbol{\theta}_{n,t+1} - \boldsymbol{\theta}\|^2}{2\eta} + \frac{\eta q_{n,t}}{2} \|\nabla \mathcal{L}(\boldsymbol{\theta}_{n,t}^\top \mathbf{z}_n(\mathbf{x}_t), y_t)\|^2. \end{aligned} \quad (30)$$

From (28), (29) and (30), we can conclude that

$$\mathcal{L}(\boldsymbol{\theta}_{n,t}^\top \mathbf{z}_n(\mathbf{x}_t), y_t) - \mathcal{L}(\boldsymbol{\theta}^\top \mathbf{z}_n(\mathbf{x}_t), y_t) \leq \frac{\|\boldsymbol{\theta}_{n,t} - \boldsymbol{\theta}\|^2 - \|\boldsymbol{\theta}_{n,t+1} - \boldsymbol{\theta}\|^2}{2\eta q_{n,t}} + \frac{\eta}{2} \|\nabla \mathcal{L}(\boldsymbol{\theta}_{n,t}^\top \mathbf{z}_n(\mathbf{x}_t), y_t)\|^2. \quad (31)$$

Summing (31) over  $t = 1, \dots, T$ , we obtain

$$\sum_{t=1}^T (\mathcal{L}(\boldsymbol{\theta}_{n,t}^\top \mathbf{z}_n(\mathbf{x}_t), y_t) - \mathcal{L}(\boldsymbol{\theta}^\top \mathbf{z}_n(\mathbf{x}_t), y_t)) \leq \sum_{t=1}^T \frac{\|\boldsymbol{\theta}_{n,t} - \boldsymbol{\theta}\|^2 - \|\boldsymbol{\theta}_{n,t+1} - \boldsymbol{\theta}\|^2}{2\eta q_{n,t}} + \frac{\eta}{2} \sum_{t=1}^T \|\nabla \mathcal{L}(\boldsymbol{\theta}_{n,t}^\top \mathbf{z}_n(\mathbf{x}_t), y_t)\|^2. \quad (32)$$

Let  $q_n^{\min} = \min_{\forall t \in \{1, \dots, T\}} q_{n,t}$ . Based on (a2), the right hand side of (32) can be bounded by

$$\begin{aligned} \sum_{t=1}^T \frac{\|\boldsymbol{\theta}_{n,t} - \boldsymbol{\theta}\|^2 - \|\boldsymbol{\theta}_{n,t+1} - \boldsymbol{\theta}\|^2}{2\eta q_{n,t}} + \frac{\eta}{2} \sum_{t=1}^T \|\nabla \mathcal{L}(\boldsymbol{\theta}_{n,t}^\top \mathbf{z}_n(\mathbf{x}_t), y_t)\|^2 &\leq \sum_{t=1}^T \frac{\|\boldsymbol{\theta}_{n,t} - \boldsymbol{\theta}\|^2 - \|\boldsymbol{\theta}_{n,t+1} - \boldsymbol{\theta}\|^2}{2\eta q_n^{\min}} + \frac{\eta}{2} \sum_{t=1}^T L^2 \\ &= \frac{\|\boldsymbol{\theta}_{n,1} - \boldsymbol{\theta}\|^2 - \|\boldsymbol{\theta}_{n,T+1} - \boldsymbol{\theta}\|^2}{2\eta q_n^{\min}} + \frac{\eta L^2 T}{2} \end{aligned} \quad (33)$$

where  $L$  is the Lipschitz constant. Using the facts that  $\boldsymbol{\theta}_{n,1} = \mathbf{0}$  and non-negativity of  $\|\boldsymbol{\theta}_{n,T+1} - \boldsymbol{\theta}\|^2$ , from (32) and (33) we can conclude that

$$\sum_{t=1}^T \mathcal{L}(\boldsymbol{\theta}_{n,t}^\top \mathbf{z}_n(\mathbf{x}_t), y_t) - \sum_{t=1}^T \mathcal{L}(\boldsymbol{\theta}^\top \mathbf{z}_n(\mathbf{x}_t), y_t) \leq \frac{\|\boldsymbol{\theta}\|^2}{2\eta q_n^{\min}} + \frac{\eta L^2 T}{2}. \quad (34)$$

By choosing  $\boldsymbol{\theta} = \boldsymbol{\theta}_n^*$  such that  $\hat{f}_{t,n}^*(\mathbf{x}) = (\boldsymbol{\theta}_n^*)^\top \mathbf{z}_n(\mathbf{x})$ , we arrive at

$$\sum_{t=1}^T \mathcal{L}(\hat{f}_{\text{RF},n}(\mathbf{x}_t), y_t) - \sum_{t=1}^T \mathcal{L}(\hat{f}_{t,n}^*(\mathbf{x}_t), y_t) \leq \frac{\|\boldsymbol{\theta}_n^*\|^2}{2\eta q_n^{\min}} + \frac{\eta L^2 T}{2} \quad (35)$$

where  $\hat{f}_{\text{RF},n}(\mathbf{x}_t) = \boldsymbol{\theta}_{n,t}^\top \mathbf{z}_n(\mathbf{x}_t)$ . □

**Lemma 4.** Under (a1) and (a2), the following holds

$$\sum_{t=1}^T \mathbb{E}[\mathcal{L}(\hat{f}_t(\mathbf{x}_t), y_t)] - \sum_{t=1}^T \mathcal{L}(\hat{f}_{\text{RF},n}(\mathbf{x}_t), y_t) \leq \frac{2^b}{\eta} \ln N + \eta_e J T + \frac{\eta}{2^{b+1}} \sum_{t=1}^T \sum_{n=1}^N \frac{1}{q_{n,t}} \quad (36)$$

where  $\eta$  is the learning rate,  $\eta_e$  is the exploration rate,  $b = \lfloor \log_2(J) \rfloor$ ,  $q_{n,t} = \sum_{j=1}^J p_{j,t} \left(1 - (1 - p_{t,j}^{(\kappa_n)})^M\right)$  and  $N$  denotes the number of kernels.

*Proof.* Let  $W_t = \sum_{n=1}^N w_{n,t}$ . For any  $t$  we find

$$\frac{W_{t+1}}{W_t} = \sum_{j=1}^J p_{j,t} \frac{W_{t+1}}{W_t} = \sum_{j=1}^J p_{j,t} \sum_{n=1}^N \frac{w_{n,t+1}}{W_t} = \sum_{j=1}^J p_{j,t} \sum_{n=1}^N \frac{w_{n,t}}{W_t} \exp\left(-\frac{\eta}{2^b} \ell_{n,t}\right). \quad (37)$$

Based on (17), we have

$$\frac{w_{n,t}}{W_t} = \frac{p_{t,j}^{(\kappa_n)} - \frac{\eta_e^j}{N}}{1 - \eta_e^j}, \forall j \in \{1, \dots, J\}. \quad (38)$$

Combining (37) with (38) obtains

$$\frac{W_{t+1}}{W_t} = \sum_{j=1}^J p_{j,t} \sum_{n=1}^N \frac{p_{t,j}^{(\kappa_n)} - \frac{\eta_e^j}{N}}{1 - \eta_e^j} \exp\left(-\frac{\eta}{2^b} \ell_{n,t}\right). \quad (39)$$

Using the inequality  $e^{-x} \leq 1 - x + \frac{1}{2}x^2, \forall x \geq 0$ , (39) leads to

$$\frac{W_{t+1}}{W_t} \leq \sum_{j=1}^J p_{j,t} \sum_{n=1}^N \frac{p_{t,j}^{(\kappa_n)} - \frac{\eta_e^j}{N}}{1 - \eta_e^j} \left(1 - \frac{\eta}{2^b} \ell_{n,t} + \frac{1}{2} \left(\frac{\eta}{2^b} \ell_{n,t}\right)^2\right). \quad (40)$$

Taking logarithm from both sides of inequality (40), and use the fact that  $1 + x \leq e^x$ , we have

$$\ln \frac{W_{t+1}}{W_t} \leq \sum_{j=1}^J p_{j,t} \sum_{n=1}^N \frac{p_{t,j}^{(\kappa_n)} - \frac{\eta_e^j}{N}}{1 - \eta_e^j} \left(-\frac{\eta}{2^b} \ell_{n,t} + \frac{1}{2} \left(\frac{\eta}{2^b} \ell_{n,t}\right)^2\right). \quad (41)$$

Summing (41) over  $t$  from 1 to  $T$  results in

$$\ln \frac{W_{T+1}}{W_1} \leq \sum_{t=1}^T \sum_{j=1}^J p_{j,t} \sum_{n=1}^N \frac{p_{t,j}^{(\kappa_n)} - \frac{\eta_e^j}{N}}{1 - \eta_e^j} \left( -\frac{\eta}{2^b} \ell_{n,t} + \frac{1}{2} \left( \frac{\eta}{2^b} \ell_{n,t} \right)^2 \right). \quad (42)$$

Furthermore, recall the updating rule of  $w_{n,T+1}$  in (13), for any  $n$  we have

$$\ln \frac{W_{T+1}}{W_1} \geq \ln \frac{w_{n,T+1}}{W_1} = -\ln N - \sum_{t=1}^T \frac{\eta}{2^b} \ell_{n,t}. \quad (43)$$

Combining (42) with (43) results in

$$\begin{aligned} & \sum_{t=1}^T \sum_{j=1}^J p_{j,t} \sum_{n=1}^N \frac{p_{t,j}^{(\kappa_n)}}{1 - \eta_e^j} \left( \frac{\eta}{2^b} \ell_{n,t} \right) - \sum_{t=1}^T \frac{\eta}{2^b} \ell_{n,t} \\ & \leq \ln N + \sum_{t=1}^T \sum_{j=1}^J p_{j,t} \sum_{n=1}^N \frac{\frac{\eta_e^j}{N}}{1 - \eta_e^j} \left( \frac{\eta}{2^b} \ell_{n,t} \right) + \sum_{t=1}^T \sum_{j=1}^J p_{j,t} \sum_{n=1}^N \frac{p_{t,j}^{(\kappa_n)} - \frac{\eta_e^j}{N}}{1 - \eta_e^j} \left( \frac{1}{2} \left( \frac{\eta}{2^b} \ell_{n,t} \right)^2 \right). \end{aligned} \quad (44)$$

Multiplying both sides by  $(1 - \eta_e^J) \frac{2^b}{\eta}$ , we arrive at

$$\begin{aligned} & \sum_{t=1}^T \sum_{j=1}^J p_{j,t} \sum_{n=1}^N p_{t,j}^{(\kappa_n)} \frac{1 - \eta_e^J}{1 - \eta_e^j} \ell_{n,t} - \sum_{t=1}^T (1 - \eta_e^J) \ell_{n,t} \\ & \leq (1 - \eta_e^J) \frac{2^b}{\eta} \ln N + \sum_{t=1}^T \sum_{j=1}^J p_{j,t} \sum_{n=1}^N \frac{\eta_e^j (1 - \eta_e^J)}{N(1 - \eta_e^j)} \ell_{n,t} + \sum_{t=1}^T \sum_{j=1}^J p_{j,t} \sum_{n=1}^N \frac{(1 - \eta_e^J) (p_{t,j}^{(\kappa_n)} - \frac{\eta_e^j}{N})}{1 - \eta_e^j} \left( \frac{\eta}{2^{b+1}} \ell_{n,t}^2 \right). \end{aligned} \quad (45)$$

Also, using the fact that  $0 < \eta_e \leq 1$  we can conclude that  $1 - \eta_e^J < 1$  and for all  $j \geq 1$ ,  $\eta_e^j \leq \eta_e$ , the RHS of (45) can be upper bounded by

$$\begin{aligned} & (1 - \eta_e^J) \frac{2^b}{\eta} \ln N + \sum_{t=1}^T \sum_{j=1}^J p_{j,t} \sum_{n=1}^N \frac{\eta_e^j (1 - \eta_e^J)}{N(1 - \eta_e^j)} \ell_{n,t} + \sum_{t=1}^T \sum_{j=1}^J p_{j,t} \sum_{n=1}^N \frac{(1 - \eta_e^J) (p_{t,j}^{(\kappa_n)} - \frac{\eta_e^j}{N})}{1 - \eta_e^j} \left( \frac{\eta}{2^{b+1}} \ell_{n,t}^2 \right) \\ & \leq \frac{2^b}{\eta} \ln N + \sum_{t=1}^T \sum_{j=1}^J p_{j,t} \sum_{n=1}^N \frac{\eta_e (1 - \eta_e^J)}{N(1 - \eta_e)} \ell_{n,t} + \sum_{t=1}^T \sum_{j=1}^J p_{j,t} \sum_{n=1}^N \frac{p_{t,j}^{(\kappa_n)} - \frac{\eta_e^j}{N}}{1 - \eta_e^j} \left( \frac{\eta}{2^{b+1}} \ell_{n,t}^2 \right). \end{aligned} \quad (46)$$

Since  $1 - \eta_e^J = (1 - \eta_e)(1 + \dots + \eta_e^{J-1})$  and  $\eta_e \leq 1$ , the following bound holds for the second term on the RHS of (46)

$$\begin{aligned} & \sum_{t=1}^T \sum_{j=1}^J p_{j,t} \sum_{n=1}^N \frac{\eta_e (1 - \eta_e^J)}{N(1 - \eta_e)} \ell_{n,t} = \sum_{t=1}^T \sum_{j=1}^J p_{j,t} \sum_{n=1}^N \frac{\eta_e (1 + \dots + \eta_e^{J-1})}{N} \ell_{n,t} \\ & \leq \sum_{t=1}^T \sum_{j=1}^J p_{j,t} \sum_{n=1}^N \frac{\eta_e^J}{N} \ell_{n,t}. \end{aligned} \quad (47)$$

Meanwhile, as  $\eta_e^J \leq \eta_e^j$  for all  $j$ ,  $1 \leq j \leq J$ , the LHS of (45) can be bounded by

$$\sum_{t=1}^T \sum_{j=1}^J p_{j,t} \sum_{n=1}^N p_{t,j}^{(\kappa_n)} \frac{1 - \eta_e^J}{1 - \eta_e^j} \ell_{n,t} - \sum_{t=1}^T (1 - \eta_e^J) \ell_{n,t} \geq \sum_{t=1}^T \sum_{j=1}^J p_{j,t} \sum_{n=1}^N p_{t,j}^{(\kappa_n)} \ell_{n,t} - \sum_{t=1}^T \ell_{n,t}. \quad (48)$$

Combining (45), (46), (47) and (48), we can conclude that

$$\begin{aligned} & \sum_{t=1}^T \sum_{j=1}^J p_{j,t} \sum_{n=1}^N p_{t,j}^{(\kappa_n)} \ell_{n,t} - \sum_{t=1}^T \ell_{n,t} \\ & \leq \frac{2^b}{\eta} \ln N + \sum_{t=1}^T \sum_{j=1}^J p_{j,t} \sum_{n=1}^N \frac{\eta_e^J}{N} \ell_{n,t} + \sum_{t=1}^T \sum_{j=1}^J p_{j,t} \sum_{n=1}^N \frac{p_{t,j}^{(\kappa_n)} - \frac{\eta_e^j}{N}}{1 - \eta_e^j} \left( \frac{\eta}{2^{b+1}} \ell_{n,t}^2 \right). \end{aligned} \quad (49)$$

Recall the probability of observing the loss of  $n$ -th kernel at time  $t$  given in (18), the expected first and second moments of  $\ell_{n,t}$  in (14) given the losses incurred up to time instant  $t-1$ , i.e.,  $\{\mathcal{L}(\hat{f}_\tau(\mathbf{x}_\tau), y_\tau)\}_{\tau=1}^{t-1}$  can be written as

$$\mathbb{E}[\ell_{n,t}] = \sum_{j=1}^J p_{j,t} \left(1 - (1 - p_{t,j}^{(\kappa_n)})^M\right) \frac{\mathcal{L}(\hat{f}_{RF,n}(\mathbf{x}_t), y_t)}{q_{n,t}} = \mathcal{L}(\hat{f}_{RF,n}(\mathbf{x}_t), y_t) \quad (50a)$$

$$\mathbb{E}[\ell_{n,t}^2] = \sum_{j=1}^J p_{j,t} \left(1 - (1 - p_{t,j}^{(\kappa_n)})^M\right) \frac{\mathcal{L}^2(\hat{f}_{RF,n}(\mathbf{x}_t), y_t)}{q_{n,t}^2} = \frac{\mathcal{L}^2(\hat{f}_{RF,n}(\mathbf{x}_t), y_t)}{q_{n,t}} \leq \frac{1}{q_{n,t}}. \quad (50b)$$

Based on (50b), the third term in the right hand side of (49) can be bounded as follows

$$\sum_{t=1}^T \sum_{j=1}^J p_{j,t} \sum_{n=1}^N \frac{p_{t,j}^{(\kappa_n)} - \frac{\eta_e^j}{N}}{1 - \eta_e^j} \left(\frac{\eta}{2^{b+1}} \ell_{n,t}^2\right) \leq \sum_{t=1}^T \sum_{j=1}^J p_{j,t} \sum_{n=1}^N \frac{p_{t,j}^{(\kappa_n)} - \frac{\eta_e^j}{N}}{1 - \eta_e^j} \left(\frac{\eta}{2^{b+1} q_{n,t}}\right). \quad (51)$$

Taking the expected value of (49) at each time  $t$  given  $\{\mathcal{L}(\hat{f}_\tau(\mathbf{x}_\tau), y_\tau)\}_{\tau=1}^{t-1}$  and combining with (50a) and (51) we have

$$\begin{aligned} & \sum_{t=1}^T \sum_{j=1}^J p_{j,t} \sum_{n=1}^N p_{t,j}^{(\kappa_n)} \mathcal{L}(\hat{f}_{RF,n}(\mathbf{x}_t), y_t) - \sum_{t=1}^T \mathcal{L}(\hat{f}_{RF,n}(\mathbf{x}_t), y_t) \\ & \leq \frac{2^b}{\eta} \ln N + \sum_{t=1}^T \sum_{j=1}^J p_{j,t} \sum_{n=1}^N \frac{\eta_e^j}{N} \mathcal{L}(\hat{f}_{RF,n}(\mathbf{x}_t), y_t) + \sum_{t=1}^T \sum_{j=1}^J p_{j,t} \sum_{n=1}^N \frac{p_{t,j}^{(\kappa_n)} - \frac{\eta_e^j}{N}}{1 - \eta_e^j} \left(\frac{\eta}{2^{b+1} q_{n,t}}\right). \end{aligned} \quad (52)$$

Since  $\frac{w_{n,t}}{W_t} = \frac{p_{t,j}^{(\kappa_n)} - \frac{\eta_e^j}{N}}{1 - \eta_e^j} \leq 1$ , replace  $\frac{p_{t,j}^{(\kappa_n)} - \frac{\eta_e^j}{N}}{1 - \eta_e^j} \leq 1$  by 1, the inequality in (52) still holds

$$\begin{aligned} & \sum_{t=1}^T \sum_{j=1}^J p_{j,t} \sum_{n=1}^N p_{t,j}^{(\kappa_n)} \mathcal{L}(\hat{f}_{RF,n}(\mathbf{x}_t), y_t) - \sum_{t=1}^T \mathcal{L}(\hat{f}_{RF,n}(\mathbf{x}_t), y_t) \\ & \leq \frac{2^b}{\eta} \ln N + \sum_{t=1}^T \sum_{j=1}^J p_{j,t} \sum_{n=1}^N \frac{\eta_e^j}{N} \mathcal{L}(\hat{f}_{RF,n}(\mathbf{x}_t), y_t) + \frac{\eta}{2^{b+1}} \sum_{t=1}^T \sum_{j=1}^J p_{j,t} \sum_{n=1}^N \frac{1}{q_{n,t}}. \end{aligned} \quad (53)$$

Also, using the fact that  $\sum_{j=1}^L p_{j,t} = 1$ , for the third term in the right hand side of (53) we have

$$\frac{\eta}{2^{b+1}} \sum_{t=1}^T \sum_{j=1}^J p_{j,t} \sum_{n=1}^N \frac{1}{q_{n,t}} = \frac{\eta}{2^{b+1}} \sum_{t=1}^T \sum_{n=1}^N \frac{1}{q_{n,t}}. \quad (54)$$

Furthermore, based on that  $\mathcal{L}(\hat{f}_{RF,n}(\mathbf{x}_t), y_t) \leq 1$  in (a2), the following inequality holds

$$\sum_{t=1}^T \sum_{j=1}^J p_{j,t} \sum_{n=1}^N \frac{\eta_e^j}{N} \mathcal{L}(\hat{f}_{RF,n}(\mathbf{x}_t), y_t) \leq \sum_{t=1}^T \sum_{j=1}^J p_{j,t} \sum_{n=1}^N \frac{\eta_e^j}{N} = \eta_e J T. \quad (55)$$

From (53), (54) and (55), we can conclude that

$$\begin{aligned} & \sum_{t=1}^T \sum_{j=1}^J p_{j,t} \sum_{n=1}^N p_{t,j}^{(\kappa_n)} \mathcal{L}(\hat{f}_{RF,n}(\mathbf{x}_t), y_t) - \sum_{t=1}^T \mathcal{L}(\hat{f}_{RF,n}(\mathbf{x}_t), y_t) \\ & \leq \frac{2^b}{\eta} \ln N + \eta_e J T + \frac{\eta}{2^{b+1}} \sum_{t=1}^T \sum_{n=1}^N \frac{1}{q_{n,t}}. \end{aligned} \quad (56)$$

According to the procedure of generating the graph  $G_t$  which is presented in Algorithm 1, for each selective node  $v_j^{(c)}$  a subset of kernels is chosen using PMF  $p_{t,j}^{(\kappa)}$  in  $M$  independent trials. In fact, a subset of kernels is assigned to each node

$v_j^{(c)}$  in  $M$  independent trials and in each trial one kernel is assigned and its associated entry in the sub-adjacency matrix  $A$  becomes 1. Now, let  $b_n$  represents the frequency that  $n$ -th kernel is chosen in  $M$  independent trials. Thus,  $\{b_n\}_{n=1}^N$  can be viewed as the solution to the following linear equation

$$b_1 + \dots + b_N = M, \quad \text{s.t. } b_n \geq 0, b_n \in \mathbb{N} \quad (57)$$

where  $\mathbb{N}$  denotes the set of natural numbers. There are  $\binom{N+M-1}{N}$  different solutions for (57). Let,  $\{b_{n,k}\}_{n=1}^N$  denotes  $k$ -th set of solution for (57). Based on Jensen's inequality, for the expected value of  $\mathcal{L}(\hat{f}_t(\mathbf{x}_t), y_t)$  we have

$$\begin{aligned} \mathbb{E}[\mathcal{L}(\hat{f}_t(\mathbf{x}_t), y_t)] &= \sum_{j=1}^J p_{j,t} \sum_{k=1}^{\binom{N+M-1}{N}} \left( \prod_{n=1}^N (p_{t,j}^{(\kappa_n)})^{b_{n,k}} \right) \mathcal{L} \left( \sum_{n \in \mathcal{S}_t} \bar{w}_{n,t} \hat{f}_{\text{RF},n}(\mathbf{x}_t), y_t \right) \\ &\leq \sum_{j=1}^J p_{j,t} \sum_{k=1}^{\binom{N+M-1}{N}} \left( \prod_{n=1}^N (p_{t,j}^{(\kappa_n)})^{b_{n,k}} \right) \sum_{n \in \mathcal{S}_t} \bar{w}_{n,t} \mathcal{L}(\hat{f}_{\text{RF},n}(\mathbf{x}_t), y_t). \end{aligned} \quad (58)$$

Also, considering (58) and the fact that  $\bar{w}_{n,t} \leq 1$ , we can conclude that

$$\begin{aligned} \mathbb{E}[\mathcal{L}(\hat{f}_t(\mathbf{x}_t), y_t)] &\leq \sum_{j=1}^J p_{j,t} \sum_{k=1}^{\binom{N+M-1}{N}} \left( \prod_{n=1}^N (p_{t,j}^{(\kappa_n)})^{b_{n,k}} \right) \sum_{n \in \mathcal{S}_t} \bar{w}_{n,t} \mathcal{L}(\hat{f}_{\text{RF},n}(\mathbf{x}_t), y_t) \\ &\leq \sum_{j=1}^J p_{j,t} \sum_{k=1}^{\binom{N+M-1}{N}} \left( \prod_{n=1}^N (p_{t,j}^{(\kappa_n)})^{b_{n,k}} \right) \sum_{n \in \mathcal{S}_t} \mathcal{L}(\hat{f}_{\text{RF},n}(\mathbf{x}_t), y_t). \end{aligned} \quad (59)$$

Note that the number of ways to solve (57) when  $n$ -th kernel is chosen for at least one time equals to the number of ways to solve the following problem

$$\tilde{b}_{1,n} + \dots + \tilde{b}_{N,n} = M - 1, \quad \text{s.t. } \tilde{b}_{m,n} \geq 0, \tilde{b}_{m,n} \in \mathbb{N}. \quad (60)$$

There are  $\binom{N+M-2}{N}$  different solutions for (60). Let  $\{\tilde{b}_{m,n}^{(k)}\}_{n=1}^N$  denotes  $k$ -th set of solution for (60). Therefore, based on this, from (59) we can conclude the following equality

$$\begin{aligned} &\sum_{j=1}^J p_{j,t} \sum_{k=1}^{\binom{N+M-1}{N}} \left( \prod_{n=1}^N (p_{t,j}^{(\kappa_n)})^{b_{n,k}} \right) \sum_{n \in \mathcal{S}_t} \mathcal{L}(\hat{f}_{\text{RF},n}(\mathbf{x}_t), y_t) \\ &= \sum_{j=1}^J p_{j,t} \sum_{n=1}^N p_{t,j}^{(\kappa_n)} \sum_{k=1}^{\binom{N+M-2}{N}} \left( \prod_{m=1}^N (p_{t,j}^{(\kappa_m)})^{\tilde{b}_{m,n}^{(k)}} \right) \mathcal{L}(\hat{f}_{\text{RF},n}(\mathbf{x}_t), y_t) \end{aligned} \quad (61)$$

where  $\sum_{k=1}^{\binom{N+M-2}{N}} \left( \prod_{m=1}^N (p_{t,j}^{(\kappa_m)})^{\tilde{b}_{m,n}^{(k)}} \right)$  is the total probability of all  $\binom{N+M-2}{N}$  possible solutions of (60). Therefore,  $\sum_{k=1}^{\binom{N+M-2}{N}} \left( \prod_{m=1}^N (p_{t,j}^{(\kappa_m)})^{\tilde{b}_{m,n}^{(k)}} \right) = 1$ . Substituting (61) into (58), we obtain

$$\mathbb{E}[\mathcal{L}(\hat{f}_t(\mathbf{x}_t), y_t)] \leq \sum_{j=1}^J p_{j,t} \sum_{n=1}^N p_{t,j}^{(\kappa_n)} \mathcal{L}(\hat{f}_{\text{RF},n}(\mathbf{x}_t), y_t). \quad (62)$$

Combining (56) with (62) leads to

$$\sum_{t=1}^T \mathbb{E}[\mathcal{L}(\hat{f}_t(\mathbf{x}_t), y_t)] - \sum_{t=1}^T \mathcal{L}(\hat{f}_{n,t}(\mathbf{x}_t), y_t) \leq \frac{2^b}{\eta} \ln N + \eta_e J T + \frac{\eta}{2^{b+1}} \sum_{t=1}^T \sum_{n=1}^N \frac{1}{q_{n,t}} \quad (63)$$

which concludes to proof of Lemma 4.  $\square$

From (25) in Lemma 3 and (36) in Lemma 4, we conclude that

$$\sum_{t=1}^T \mathbb{E}[\mathcal{L}(\hat{f}_t(\mathbf{x}_t), y_t)] - \sum_{t=1}^T \mathcal{L}(\hat{f}_{t,n}^*(\mathbf{x}_t), y_t) \leq \frac{2^b}{\eta} \ln N + \frac{\|\boldsymbol{\theta}_n^*\|^2}{2\eta q_n^{\min}} + \frac{\eta L^2 T}{2} + \eta_e J T + \frac{\eta}{2^{b+1}} \sum_{t=1}^T \sum_{n=1}^N \frac{1}{q_{n,t}}. \quad (64)$$

Furthermore, based on (18) we can write

$$q_{n,t} = \sum_{j=1}^J p_{j,t} \left(1 - (1 - p_{t,j}^{(\kappa_n)})^M\right) = \sum_{j=1}^J p_{j,t} p_{t,j}^{(\kappa_n)} \left(1 + \dots + (1 - p_{t,j}^{(\kappa_n)})^{M-1}\right) \geq \sum_{j=1}^J p_{j,t} p_{t,j}^{(\kappa_n)}. \quad (65)$$

From (65) and the facts that  $p_{j,t} > \frac{\eta_e}{J}$  and  $p_{t,j}^{(\kappa_n)} > \frac{\eta_e^j}{N}$ , the following inequality can be concluded

$$q_{n,t} \geq \sum_{j=1}^J p_{j,t} p_{t,j}^{(\kappa_n)} > p_{1,t} p_{t,1}^{(\kappa_n)} > \frac{\eta_e^2}{NJ}. \quad (66)$$

Therefore, we find  $q_n^{\min} > \frac{\eta_e^2}{NJ}$ . Combining (64) and (66) we can conclude that

$$\sum_{t=1}^T \mathbb{E}[\mathcal{L}(\hat{f}_t(\mathbf{x}_t), y_t)] - \sum_{t=1}^T \mathcal{L}(\hat{f}_{t,n}^*(\mathbf{x}_t), y_t) < \frac{2^b}{\eta} \ln N + \frac{\|\boldsymbol{\theta}_n^*\|^2 NJ}{2\eta\eta_e^2} + \frac{\eta L^2 T}{2} + \eta_e J T + \frac{\eta N^2 J T}{2^{b+1}\eta_e^2}. \quad (67)$$

Hence, Lemma 1 is proved.

## B. Proof of Theorem 2

To prove Theorem 2, the following lemma is exploited (Shen et al., 2019)

**Lemma 5.** For the optimal function estimator (19) in  $\mathcal{H}_n$  expressed as  $f_n^*(\mathbf{x}) := \sum_{t=1}^T \alpha_{n,t}^* \kappa_n(\mathbf{x}, \mathbf{x}_t)$  and its RF-based approximant  $\hat{f}_{t,n}^*(\mathbf{x}, \mathbf{x}_t) = \sum_{\tau=1}^T \alpha_{n,t}^* \mathbf{z}_n^\top(\mathbf{x}) \mathbf{z}_n(\mathbf{x}_t)$ , the following bound holds with probability at least  $1 - 2^8 \left(\frac{\sigma_n}{\epsilon}\right)^2 \exp\left(-\frac{D\epsilon^2}{4d+8}\right)$

$$\left| \sum_{t=1}^T \mathcal{L}(\hat{f}_{t,n}^*(\mathbf{x}_t), y_t) - \sum_{t=1}^T \mathcal{L}(f_n^*(\mathbf{x}_t), y_t) \right| \leq \epsilon LTC \quad (68)$$

where the equality happens if we have  $C := \max_n \sum_{t=1}^T |\alpha_{n,t}^*|$ .

*Proof.* For a given shift invariant kernel  $\kappa_n$ , the maximum point-wise error of the random feature kernel approximant is uniformly bounded with probability at least  $1 - 2^8 \left(\frac{\sigma_n}{\epsilon}\right)^2 \exp\left(-\frac{D\epsilon^2}{4d+8}\right)$ , by (Rahimi & Recht, 2007)

$$\sup_{\mathbf{x}_i, \mathbf{x}_j \in \mathcal{X}} |\mathbf{z}_n(\mathbf{x}_i)^\top \mathbf{z}_n(\mathbf{x}_j) - \kappa_n(\mathbf{x}_i, \mathbf{x}_j)| < \epsilon \quad (69)$$

Furthermore, using the triangle inequality we can conclude that

$$\left| \sum_{t=1}^T \mathcal{L}(\hat{f}_{t,n}^*(\mathbf{x}_t), y_t) - \sum_{t=1}^T \mathcal{L}(f_n^*(\mathbf{x}_t), y_t) \right| \leq \sum_{t=1}^T \left| \mathcal{L}(\hat{f}_{t,n}^*(\mathbf{x}_t), y_t) - \mathcal{L}(f_n^*(\mathbf{x}_t), y_t) \right|. \quad (70)$$

Considering the Lipschitz continuity of the loss function we can obtain the following inequality

$$\sum_{t=1}^T \left| \mathcal{L}(\hat{f}_{t,n}^*(\mathbf{x}_t), y_t) - \mathcal{L}(f_n^*(\mathbf{x}_t), y_t) \right| \leq \sum_{t=1}^T L \left| \sum_{\tau=1}^T \alpha_{n,\tau}^* \mathbf{z}_n^\top(\mathbf{x}_\tau) \mathbf{z}_n(\mathbf{x}_t) - \sum_{\tau=1}^T \alpha_{n,\tau}^* \kappa_n(\mathbf{x}_\tau, \mathbf{x}_t) \right|. \quad (71)$$

Using the Cauchy-Schwartz inequality, we obtain

$$\sum_{t=1}^T L \left| \sum_{\tau=1}^T \alpha_{n,\tau}^* \mathbf{z}_n^\top(\mathbf{x}_\tau) \mathbf{z}_n(\mathbf{x}_t) - \sum_{\tau=1}^T \alpha_{n,\tau}^* \kappa_n(\mathbf{x}_\tau, \mathbf{x}_t) \right| \leq \sum_{t=1}^T L \sum_{\tau=1}^T |\alpha_{n,\tau}^*| |\mathbf{z}_n^\top(\mathbf{x}_\tau) \mathbf{z}_n(\mathbf{x}_t) - \kappa_n(\mathbf{x}_\tau, \mathbf{x}_t)| \quad (72)$$

Hence, from (70), (71) and (72) we can conclude the following inequality

$$\left| \sum_{t=1}^T \mathcal{L}(\hat{f}_{t,n}^*(\mathbf{x}_t), y_t) - \sum_{t=1}^T \mathcal{L}(f_n^*(\mathbf{x}_t), y_t) \right| \leq \sum_{t=1}^T L \sum_{\tau=1}^T |\alpha_{n,\tau}^*| |\mathbf{z}_n^\top(\mathbf{x}_\tau) \mathbf{z}_n(\mathbf{x}_t) - \kappa_n(\mathbf{x}_\tau, \mathbf{x}_t)| \quad (73)$$

Combining (69) with (73) and considering the fact that  $C := \max_n \sum_{t=1}^T |\alpha_{n,t}^*|$ , yields the following inequality which holds with probability at least  $1 - 2^8 (\frac{\sigma_n}{\epsilon})^2 \exp(-\frac{D\epsilon^2}{4d+8})$ ,

$$\left| \sum_{t=1}^T \mathcal{L}(\hat{f}_{t,n}^*(\mathbf{x}_t), y_t) - \sum_{t=1}^T \mathcal{L}(f_n^*(\mathbf{x}_t), y_t) \right| \leq \sum_{t=1}^T L \epsilon \sum_{\tau=1}^T |\alpha_{n,\tau}^*| \leq \epsilon LTC. \quad (74)$$

□

In addition, under the kernel bound in (a3) and uniform convergence in (69) which implies  $\sup_{\mathbf{x}_t, \mathbf{x}_j \in \mathcal{X}} \mathbf{z}_n^\top(\mathbf{x}_\tau) \mathbf{z}_n(\mathbf{x}_t) \leq 1 + \epsilon$  holds with probability at least  $1 - 2^8 (\frac{\sigma_n}{\epsilon})^2 \exp(-\frac{D\epsilon^2}{4d+8})$ , it can be written that

$$\|\theta_n^*\|^2 \leq \left\| \sum_{t=1}^T \alpha_{n,t}^* \mathbf{z}_n(\mathbf{x}_t) \right\|^2 \leq \left| \sum_{t=1}^T \sum_{\tau=1}^T \alpha_{n,t}^* \alpha_{n,\tau}^* \mathbf{z}_n^\top(\mathbf{x}_t) \mathbf{z}_n(\mathbf{x}_\tau) \right| \leq (1 + \epsilon) C^2. \quad (75)$$

Combining Lemma 1 with Lemma 5 and (75), it can be concluded that the following bound holds with probability at least  $1 - 2^8 (\frac{\sigma_n}{\epsilon})^2 \exp(-\frac{D\epsilon^2}{4d+8})$ ,

$$\begin{aligned} & \sum_{t=1}^T \mathbb{E}[\mathcal{L}(\hat{f}_t(\mathbf{x}_t), y_t)] - \sum_{t=1}^T \mathcal{L}(f_n^*(\mathbf{x}_t), y_t) \\ &= \sum_{t=1}^T \mathbb{E}[\mathcal{L}(\hat{f}_t(\mathbf{x}_t), y_t)] - \sum_{t=1}^T \mathcal{L}(\hat{f}_{t,n}^*(\mathbf{x}_t), y_t) + \sum_{t=1}^T \mathcal{L}(\hat{f}_{t,n}^*(\mathbf{x}_t), y_t) - \sum_{t=1}^T \mathcal{L}(f_n^*(\mathbf{x}_t), y_t) \\ &< \frac{2^b}{\eta} \ln N + \frac{NJ(1+\epsilon)C^2}{2\eta\eta_e^2} + \frac{\eta L^2 T}{2} + \eta_e J T + \epsilon LTC + \frac{\eta N^2 J T}{2^{b+1}\eta_e^2} \end{aligned} \quad (76)$$

which completes the proof of Theorem 2.

### C. Relationship between OMKL-GF and Raker

In this section, we compare our proposed OMKL-GF with Raker (Shen et al., 2019) presented in Algorithm 3.

---

#### Algorithm 3 Raker (Shen et al., 2019)

---

**Input:** Kernels  $\kappa_n$ ,  $n = 1, \dots, N$ , step size  $\eta > 0$ , and the number of features  $D$ .

**Initialize:**  $\theta_{n,1} = \mathbf{0}$ ,  $w_{n,1} = 1$ ,  $n = 1, \dots, N$

**for**  $t = 1, \dots, T$  **do**

    Receive one datum  $\mathbf{x}_t$ .

    Construct  $\mathbf{z}_n(\mathbf{x}_t)$  via (5) for  $n = 1, \dots, N$ .

    Predict  $\hat{f}_t(\mathbf{x}_t) = \sum_{n=1}^N \frac{w_{n,t}}{\sum_{m=1}^N w_{m,t}} \hat{f}_{RF,n}(\mathbf{x}_t)$  with  $\hat{f}_{RF,n}(\mathbf{x}_t)$  in (8).

**for**  $n = 1, \dots, N$  **do**

        Obtain loss  $\mathcal{L}(\hat{f}_{RF,n}(\mathbf{x}_t), y_t)$ .

        Update  $\theta_{n,t+1}$  via (12).

        Update  $w_{n,t+1}$  via (13).

**end for**

**end for**

---

Note that both OMKL-GF and Raker utilizes random feature approximation to make the kernel-based learning task scalable. While Raker employs all kernels in the dictionary for function approximation at each time instance, our proposed OMKL-GF chooses a *time-varying* subset of kernels at each time instant by adaptively pruning irrelevant kernels. Experiments show that OMKL-GF can attain lower MSE and execution time in comparison with Raker by *actively* choosing a subset of kernels.
